# Supplementary material
Source: Springer Nature journal article supplement (https://www.springermedizin.de/resource/supplementary/12884_2010_303_MOESM3_ESM.pdf/9457418)
Supplement: MOESM3 [file 9457418]

2007

2008

2009

2010

RCT

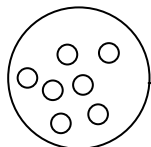

Intervention

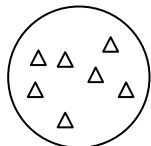

Control

1- year follow-up

Birth  
registry  
linkage

Excluded women (pathological OGTT)

Non-participants
